# Supplementary material for: Changes in CSF sPDGFRβ level and their association with blood–brain barrier breakdown in Alzheimer’s disease with or without small cerebrovascular lesions
Source: PubMed Central journal article supplement (PMC10012584; doi:10.1186/s13195-023-01199-5), 2023-03-14
Supplement: 13195_2023_1199_MOESM1_ESM.pdf [file 13195_2023_1199_MOESM1_ESM.pdf]

Figure S1

Study flowchart

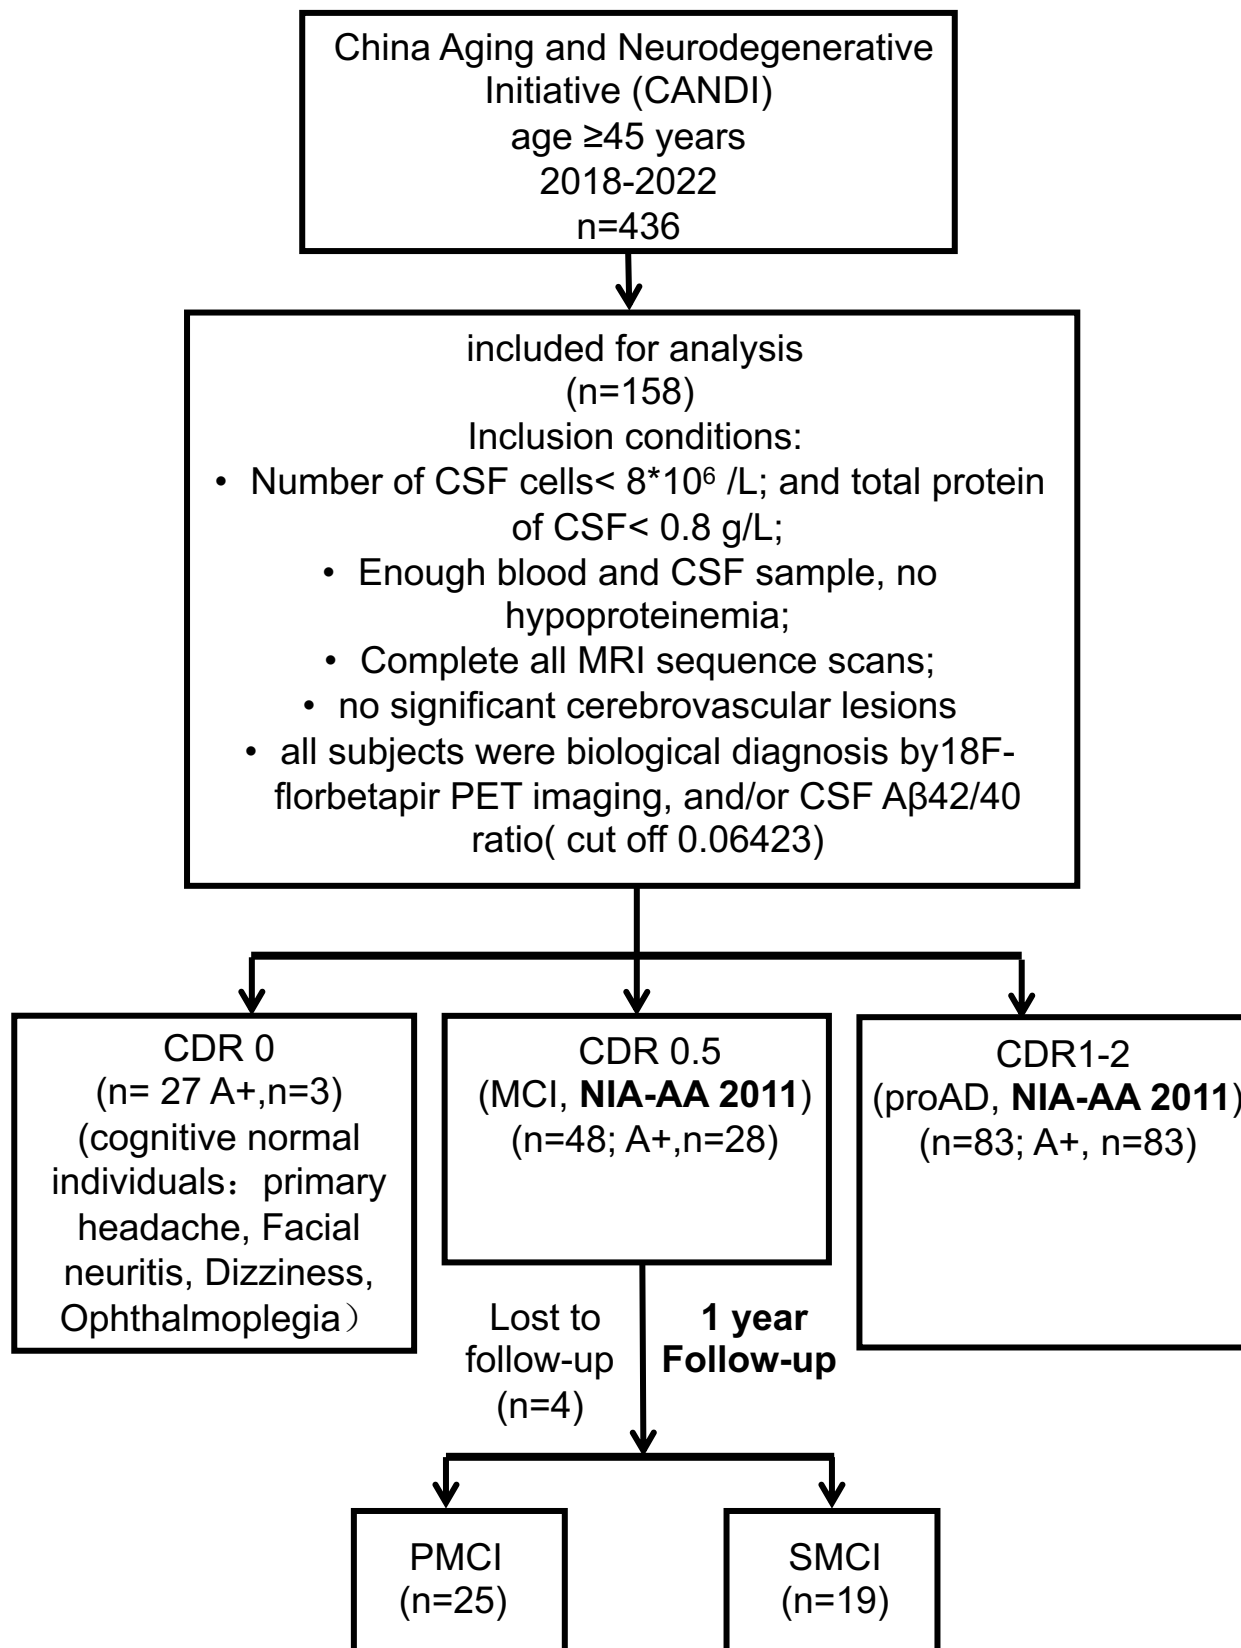

**Figure S2**

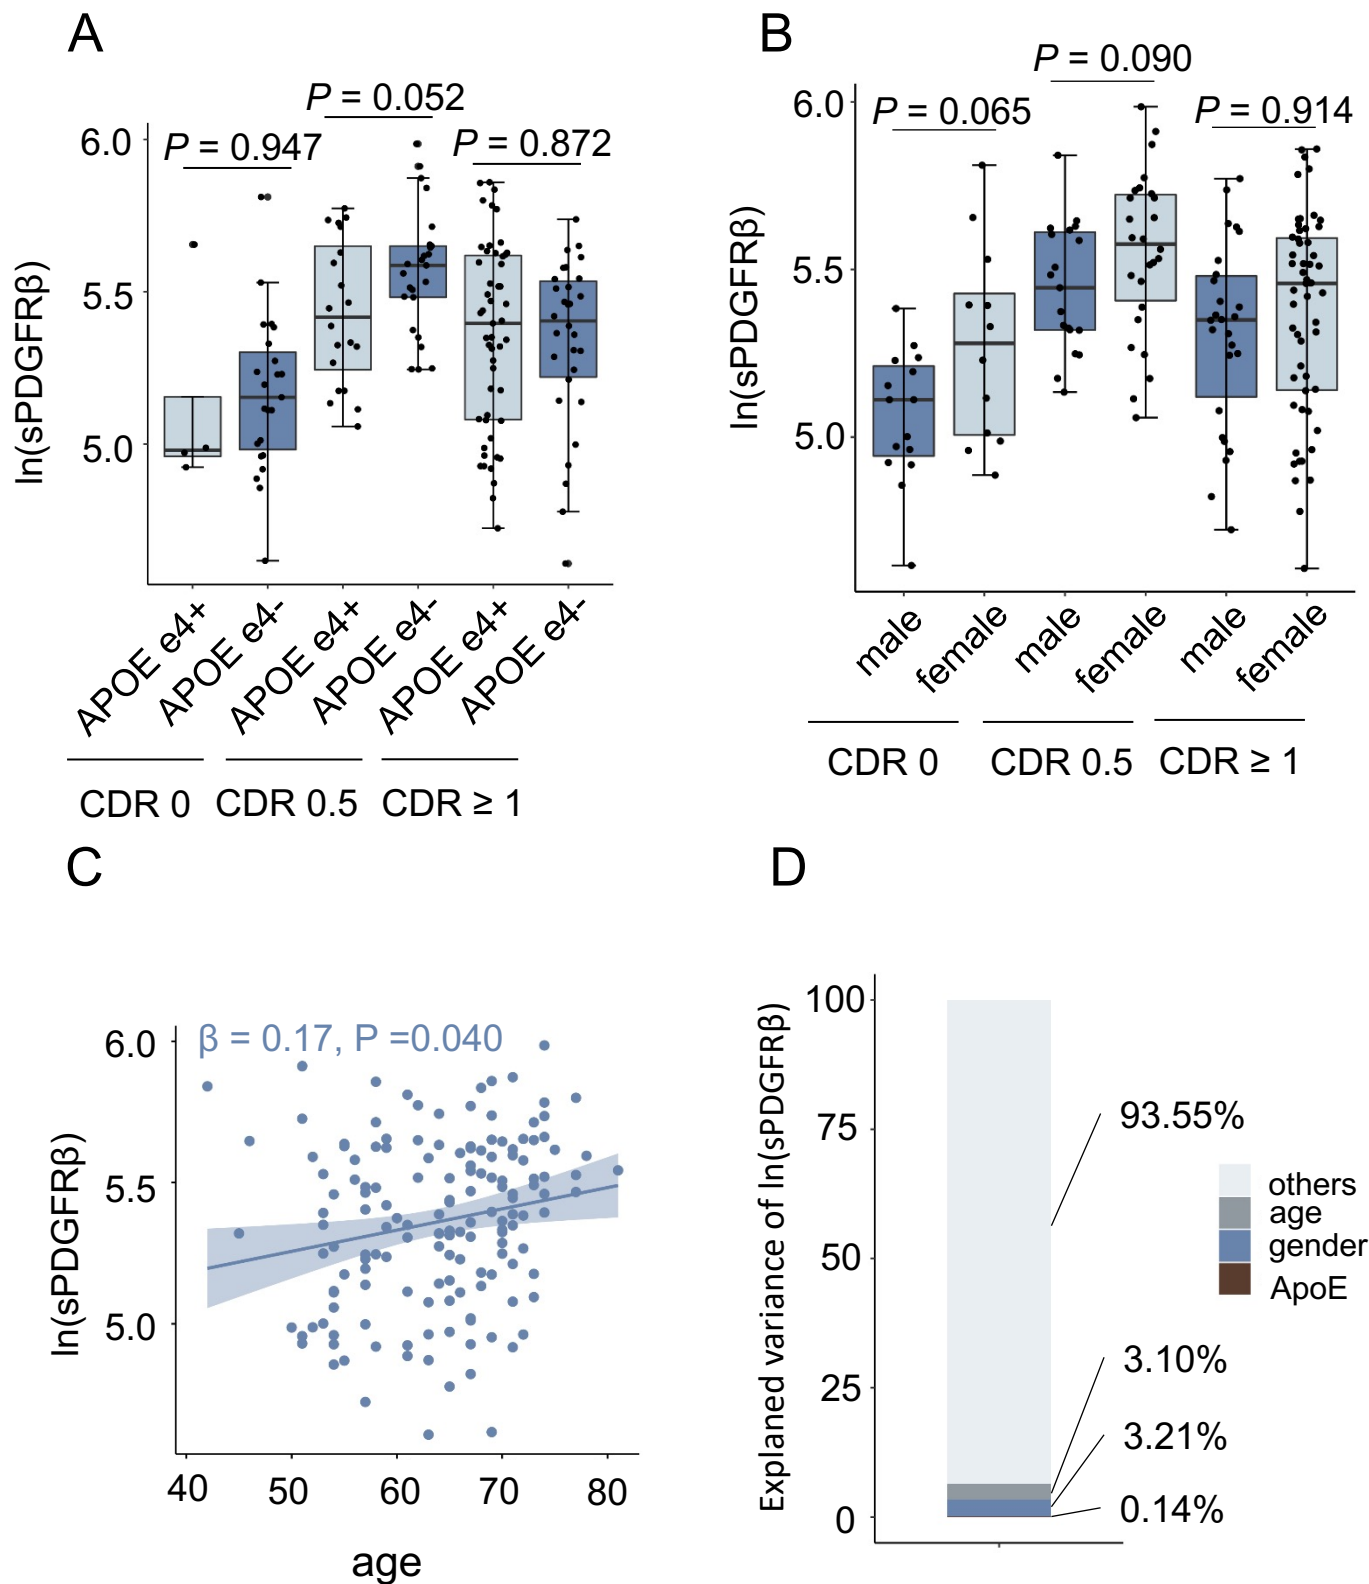

**Figure S2. The potential effects of age, sex and APOE genotype on CSF sPDGFR $\beta$  levels.** (A) Comparison of CSF sPDGFR $\beta$  levels between APOE genotype subgroups in CDR 0, CDR 0.5 and CDR 1-2 group.  $P$ -values were assessed by a one-way analysis of covariance (ANCOVA) adjusted by age, sex and CSF A $\beta$ 42/40.  $p < 0.05$  was considered statistically significant. (B) Comparison of CSF sPDGFR $\beta$  levels between male and female in CDR 0, CDR 0.5 and CDR 1-2 group.  $P$ -values were assessed by a one-way analysis of covariance (ANCOVA) adjusted by age, APOE genotype and CSF A $\beta$ 42/40.  $p < 0.05$  was considered statistically significant. (C)  $P$ -values were assessed by multiple linear regression model, adjusted by sex, APOE genotype and CSF A $\beta$ 42/40.  $p < 0.05$  was considered statistically significant. (D) Contributions of age, sex and APOE genotype to the variance of CSF sPDGFR $\beta$  levels.
